# Supplementary material for: Nucleotide Resolution Comparison of Transcription of Human Cytomegalovirus and Host Genomes Reveals Universal Use of RNA Polymerase II Elongation Control Driven by Dissimilar Core Promoter Elements
Source: PubMed Central journal article supplement (PMC6372792; doi:10.1128/mbio.02047-18), 2019-02-12
Supplement: mBio.02047-18-sf001.pdf [file mBio.02047-18-sf001.pdf]

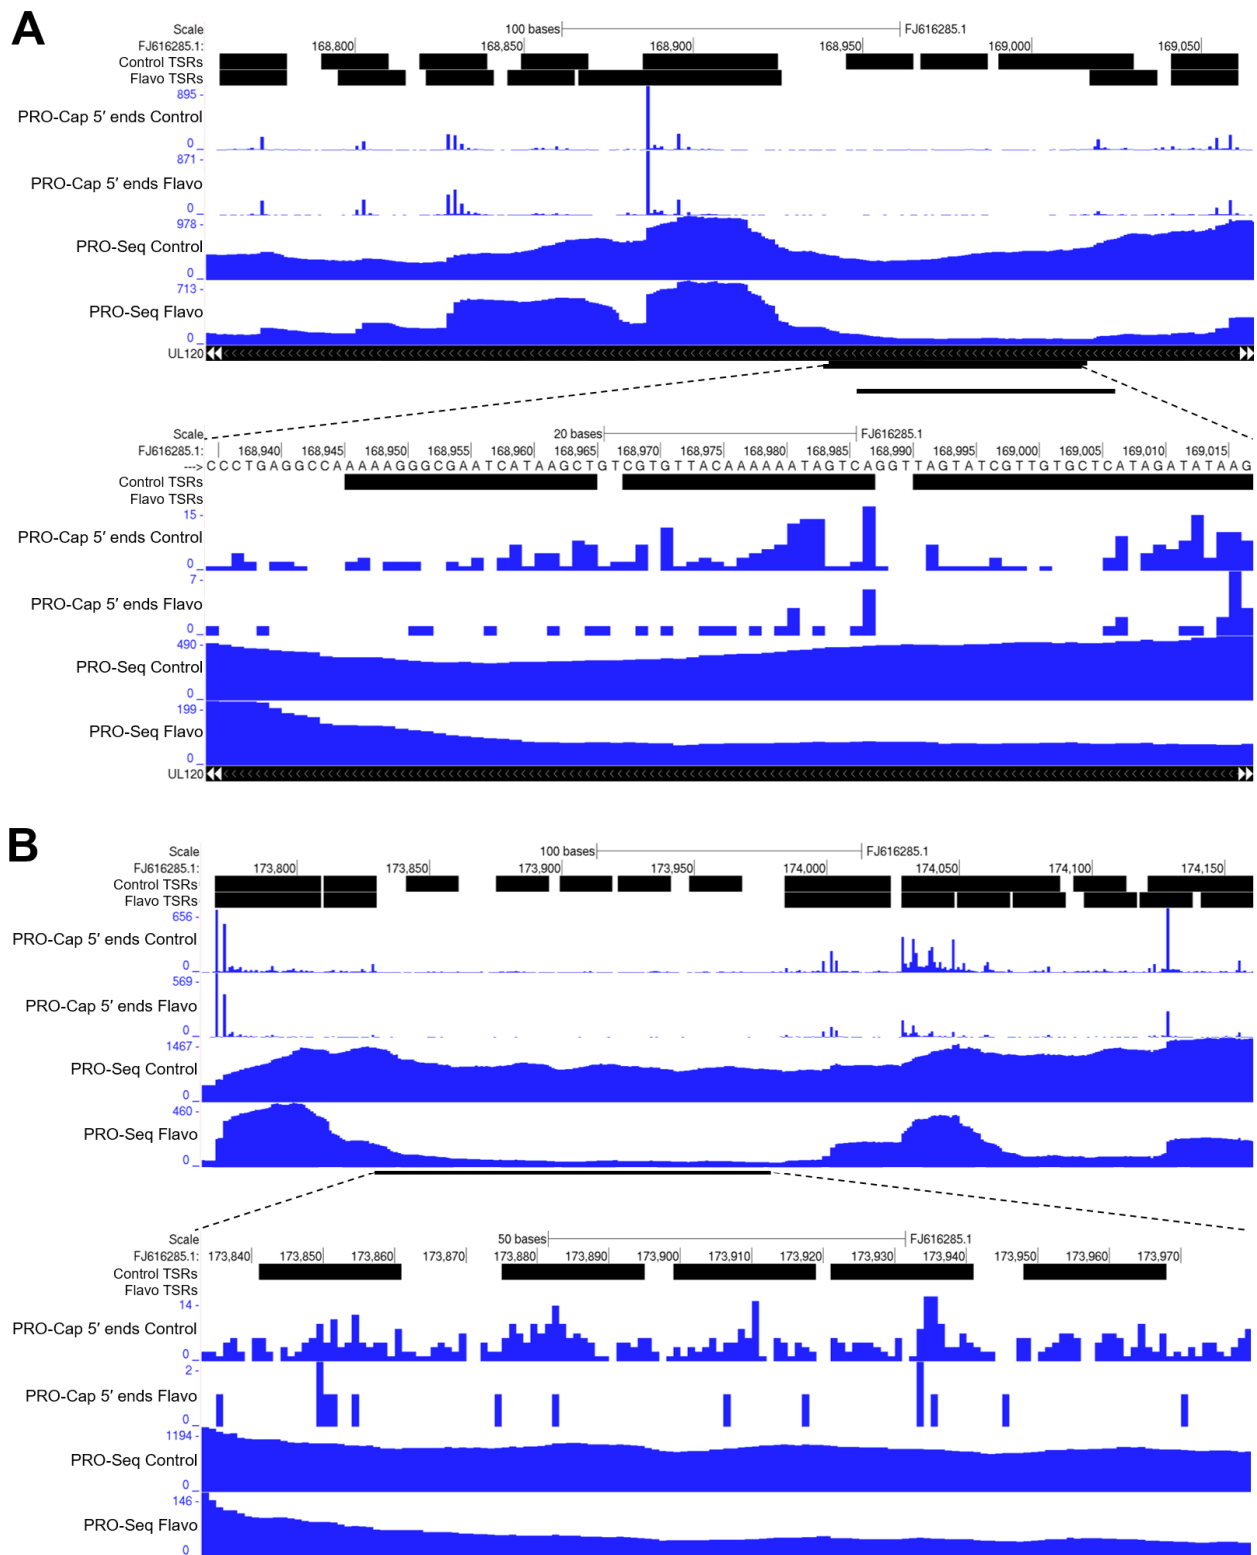

Fig. S1. Comparison of TSRs from the HCMV Towne control and flavopiridol datasets. TSR, PRO-Seq and 5' ends from PRO-Cap tracks are shown (forward direction only).
