# Supplementary material for: Nucleotide Resolution Comparison of Transcription of Human Cytomegalovirus and Host Genomes Reveals Universal Use of RNA Polymerase II Elongation Control Driven by Dissimilar Core Promoter Elements
Source: PubMed Central journal article supplement (PMC6372792; doi:10.1128/mbio.02047-18), 2019-02-12
Supplement: mBio.02047-18-sf002.pdf [file mBio.02047-18-sf002.pdf]

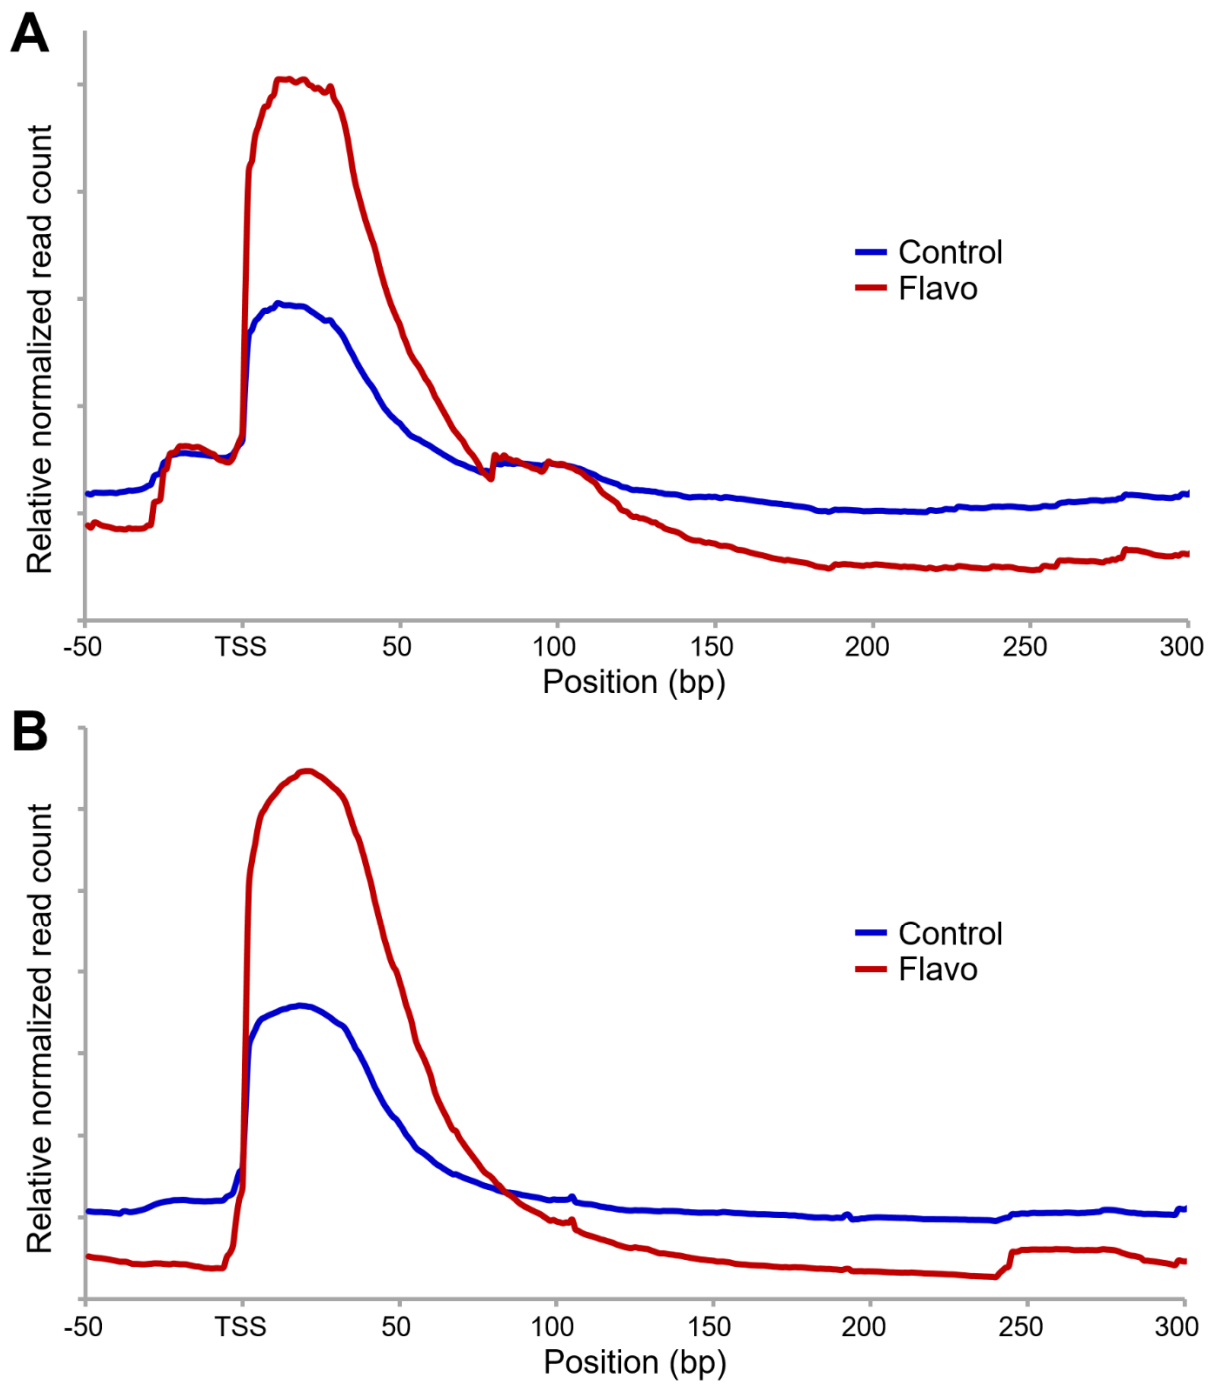

Fig. S2. Metagene analysis of selected genes. Reads around TSSs from control and flavopiridol Towne datasets with (A) TATA (358 TSRs) or (B) TATT (411 TSRs) in the -40 to -21 region were normalized and plotted.
